# Supplementary material for: Lithium promotes recovery of neurological function after spinal cord injury by inducing autophagy
Source: PubMed Central journal article supplement — Neural Regen Res. 2018 Dec;13(12):2191–9. doi: 10.4103/1673-5374.241473 (PMC6199946; doi:10.4103/1673-5374.241473), 2018-12
Supplement: NRR-13-2191_Suppl1.pdf [file NRR-13-2191_Suppl1.pdf]

## Open peer review report 1

**Reviewer:** Chang Ho Hwang, University of Ulsan, Republic of Korea.

### Comments to the authors:

#### 1. Abstract

A. Describe a full term description at a first referring instead of abbreviations: BBB, ADC, DTI, h, d, w, FA

#### B. Keywords

i. Refer to the MeSH

#### 2. Introduction

A. 55-2; Better insert some description over the known mechanism of lithium with references in detail.

B. 3-9; It should be introduced why authors choose lithium as treatment drug against SCI in the form of authors' supposition.

#### 3. Material

A. D15-17; delete the name of university.

B. Do not use abbreviation over the whole text if full term name was not introduced at first in the text.

C. 39; why did not authors insert Foley catheterization?

D. 39; Better describe the dose of antibiotics and describe a generic name, not commercial name.

E. 16; Because ROI selection is very critical factor, authors should describe the anatomical land mark or location in very detail.

F. 40-43; Better describe the specific animal models in regard of antibody types, for examples, rat or mouse, etc.

#### 4. Discussion

A. Contents of discussion section are not so enough that it cannot deliver helpful knowledgements to readers. Authors should compare the current histochemical findings with other references by point to point in the molecular basis point of view.

#### 5. Conclusion

A. Better limit the conclusion according to the current findings. That study was an in-vivo study, not RCT.
